# Impacto de la medición de consumos del uso público urbano del agua en México

## *Impact of consumption measurement for urban public use of water in Mexico*

Petronilo E. Cortez-Mejía <sup>a1\*</sup>, Edgar Eduardo López-López<sup>a2</sup> y José Manuel Rodríguez-Varela <sup>a3</sup>

<sup>a</sup> Instituto Mexicano de Tecnología del Agua, Paseo Cuauhnáhuac No. 8532, Col. Progreso, C.P. 62550, Jiutepec, Morelos, México

E-mail: <sup>a1</sup>pcortes@tlaloc.imta.mx, <sup>a2</sup>edgar\_lopez@tlaloc.imta.mx, <sup>a3</sup>manuel\_rodriguez@tlaloc.imta.mx

\*Autor para correspondencia

Recibido: 15/10/2023

Aceptado: 16/01/2024

Publicado: 31/01/2024

**Citar como:** Cortez-Mejía, P., López-López, E.E., Rodríguez-Varela, J.M. 2024. Impact of consumption measurement for urban public use of water in Mexico. *Ingeniería del agua*, 28(1), 33-45. <https://doi.org/10.4995/ia.2024.20509>

## RESUMEN

La medición de consumos en el servicio público de agua potable genera diversos beneficios, siendo el más evidente el cobro según la cantidad medida a una tarifa adecuada. Por otra parte, el cumplimiento del derecho humano al agua requiere que el suministro sea: suficiente, saludable, aceptable, accesible y asequible. En este trabajo se evalúa qué tanto la medición de consumos y las tarifas aplicadas, se reflejan en un servicio de estas características, como beneficio principal de su implementación en los municipios de México. En éstos, la cobertura del servicio al año 2018, era del 98.6%, y el consumo doméstico se facturaba en el 63.5%, donde sólo en 6.5% de éstos se hacía en base a medición y en el 31.0% en base a medición y tarifa fija. A la vez, el 76% de la población compraba agua embotellada para beber, al no confiar en el agua de la red pública.

**Palabras clave** | medición de consumos de agua; cobertura y facturación del suministro de agua en México; manejo seguro de los servicios de agua.

## ABSTRACT

*Measurement of consumption in the public drinking water service generates various benefits, the most obvious being the charging according to the quantity of water measured at an appropriate rate. On the other hand, compliance with the human right to water requires that the supply be sufficient, healthy, acceptable, accessible and affordable. This work evaluates how much the measurement of consumption and the applied rates are reflected in a service of these characteristics, as the main benefit of its implementation in the municipalities of Mexico. In these, the service coverage in 2018 was 98.6%, and domestic consumption was billed in 63.5%, where only in 6.5% of these it was based on measurement and in 31.0 % based on measurement and fixed rate. At the same time, 76% of the population bought bottled water to drink, not trusting water from the public network.*

**Key words** | measurement of water consumption; coverage and billing of water supply in Mexico; safe management of water services.

## INTRODUCCIÓN

El objetivo de este trabajo es evaluar el impacto de la medición de consumos de agua potable en México, en el servicio gestionado de manera segura, así como las consecuencias y los problemas determinantes que han estado obstaculizado su incremento sustancial. Esto a través de la información generada por los censos y encuestas que se realizan periódicamente en todo el territorio nacional.

En el campo de la medición de consumos de agua potable, se pueden encontrar en la literatura técnica trabajos de investigación sobre aspectos diversos de su implementación y funcionamiento, como es la planificación de los sistemas de medición, análisis socioeconómicos de medición universal y medición socialmente óptima, medición digital, costos de implementación, beneficios esperados, etcétera. En este sentido, se puede prever que la medición de consumos y los precios del agua tengan alguna relación con el cumplimiento del derecho humano al agua, por lo que es la finalidad de este trabajo, evaluar su impacto a nivel de entidades federativas en México.

En relación a lo anterior, al medir el volumen consumido, y facturarlos con tarifas adecuadas, se generan ahorros que se estiman en 50% respecto al consumo de cuota fija (Linaweaver, *et al.*, 1965; Bartone, 2003). De esta manera, en (Cavalcanti-Coelho, 1996) se describen los objetivos y beneficios de la medición de consumos, técnicos, económicos, financieros, y sociales; aunque se deben tener en cuenta ciertas condiciones, como se describe en el trabajo de investigación de (Chambouleyron, 2004). En éste, se analizan las ineficiencias provocadas por la medición universal, el número de medidores socialmente óptimo, el precio del agua y su relación con el costo marginal de producción, los costos de la medición y las características de la demanda de agua (Chambouleyron, 2004). Desde la perspectiva industrial y comercial que se trata en (Euromet, 2008), queda claro que es prácticamente imposible describir cualquier cosa sin referirse a pesos y medidas, y que la medición sistemática, con un nivel de incertidumbre conocido, es una de las bases del control de calidad industrial, que permite aumentar significativamente el valor, la vigencia y calidad del producto; asimismo que los costos estimados de la medición se estiman entre el 10% y el 15% de los costos de producción (Euromet, 2008). Para grandes núcleos urbanos, la medición de consumos es asimismo un instrumento de gobernabilidad a largo plazo (López-Hernández *et al.*, 2014). Más recientemente, (Monks *et al.*, 2021) realizaron un estudio exhaustivo sobre medidores digitales, con los cuales la obtención y procesamiento de datos se realiza casi en tiempo real. Estos tienen un impacto demostrable en el ahorro de agua a nivel domiciliario y de red de distribución, así como en la eficiencia de los servicios. Identificaron 77 beneficios de su aplicación, y su contribución a la sostenibilidad del recurso hídrico (Monks *et al.*, 2021).

Por cuanto al derecho humano al agua potable, la Asamblea General de las Naciones Unidas (ONU) reconoció, el 28 de julio de 2010, explícitamente el derecho humano al agua y al saneamiento, que es esencial para la realización de todos los derechos humanos (ONU, 2018a). El 8 de febrero de 2012, el Congreso de la Unión de México adicionó un sexto párrafo al artículo 4º para elevar a rango constitucional este derecho, para lo cual el Estado asume la responsabilidad de respetar, proteger y garantizar su cumplimiento, en forma accesible, suficiente, salubre, aceptable y asequible con la participación de la ciudadanía (Tabla 1) (Domínguez-Mares y Arriaga-Medina, 2015). En concordancia, a partir de los Objetivos de Desarrollo del Milenio

**Tabla 1** | Alcance de las características del derecho humano al agua.

| Alcance               | Características                                                                                                                                                                                                                                                                                                                                                                                                                                                           |
|-----------------------|---------------------------------------------------------------------------------------------------------------------------------------------------------------------------------------------------------------------------------------------------------------------------------------------------------------------------------------------------------------------------------------------------------------------------------------------------------------------------|
| Suficiente            | El abastecimiento de agua por persona debe ser suficiente y continuo, para el uso personal y doméstico, que incluye de forma general el agua de beber, el saneamiento personal, el agua para lavar la ropa, la preparación de alimentos, la limpieza del hogar y la higiene personal. De acuerdo con la Organización Mundial de la Salud (OMS), son necesarios entre 50 y 100 litros de agua por persona y día para garantizar que se cubren las necesidades más básicas. |
| Saludable             | El agua necesaria, tanto para el uso personal como doméstico, debe ser saludable; es decir, libre de microorganismos, sustancias químicas y peligros radiológicos que constituyan una amenaza para la salud humana.                                                                                                                                                                                                                                                       |
| Aceptable             | El agua ha de presentar un color, olor y sabor aceptables para ambos usos, personal y doméstico. [...] Todas las instalaciones y servicios de agua deben ser culturalmente apropiados y sensibles al género, al ciclo de la vida y a las exigencias de privacidad.                                                                                                                                                                                                        |
| Físicamente accesible | Todo el mundo tiene derecho a unos servicios de agua y saneamiento accesibles físicamente dentro o situados en la inmediata cercanía del hogar, de las instituciones académicas, en el lugar de trabajo o las instituciones de salud. De acuerdo con la OMS, la fuente de agua debe encontrarse a menos de 1.000 metros del hogar y a menos de 30 minutos.                                                                                                                |
| Asequible             | El agua y los servicios e instalaciones de acceso al agua deben ser asequibles para todos. El Programa de las Naciones Unidas para el Desarrollo (PNUD) sugiere que el costo del agua no debería superar el 3% de los ingresos del hogar.                                                                                                                                                                                                                                 |

Fuente: Elaboración propia a partir de (ONU, 2018a).

2000-2015 la ONU estableció los 17 Objetivos Globales para el Desarrollo Sostenible (ODS's), donde el ODS 6 busca “Garantizar la disponibilidad de agua y su gestión sostenible y el saneamiento para todos”; su meta 6.1 es “lograr el acceso universal y equitativo al agua potable a un precio asequible para todos” (ONU, 2023), cuyo seguimiento y monitoreo se realiza a través del indicador: 6.1.1 “Proporción de la población que utiliza servicios de agua potable gestionados de manera segura” (Tabla 2) (ONU, 2018b) (WHO y UNICEF, 2019).

**Tabla 2** | Escala de servicios de agua potable.

| Escala de servicio                      | Definición                                                                                                                                                                                                                                                                                                             |
|-----------------------------------------|------------------------------------------------------------------------------------------------------------------------------------------------------------------------------------------------------------------------------------------------------------------------------------------------------------------------|
| Servicio gestionado de forma segura     | Beber agua de una fuente de agua mejorada que se encuentra en las instalaciones, disponible cuando sea necesario y libre de contaminación fecal y química prioritaria. Las fuentes mejoradas incluyen: agua entubada, pozos excavados protegidos, manantiales protegidos, agua de lluvia y agua envasada o entregada). |
| Servicio básico                         | Beber agua de una fuente mejorada, siempre que el tiempo de recolección no sea más de 30 minutos para un viaje de ida y vuelta, incluida la cola.                                                                                                                                                                      |
| Servicio limitado                       | Agua potable de una fuente mejorada para la cual el tiempo de recolección excede los 30 minutos para un viaje de ida y vuelta, incluida la cola.                                                                                                                                                                       |
| Fuente no mejorada                      | Beber agua de un pozo excavado sin protección o de un manantial sin protección.                                                                                                                                                                                                                                        |
| Recolección directa de agua superficial | Beber agua directamente de un río, presa, lago, estanque, arroyo, canal o canal de irrigación.                                                                                                                                                                                                                         |

Fuente: Elaboración propia a partir de (WHO y UNICEF, 2019).

Respecto a la situación general de México en el acceso al agua potable y la medición de su consumo, al año 2018 existían 2463 municipios y demarcaciones territoriales de la ciudad de México, de los cuales 2429 contaban con servicio de agua de la red pública (98.6%), facturándose en 1569 (63.7% del total). Asimismo, 1563 municipios facturaron el servicio doméstico (63.5% del total), donde 59.5% lo hicieron por cuota fija, 6.7% servicio medido, 31.0% por cuota fija y servicio medido, y 2.9% no se especificó. Para el año 2020, el número de municipios o demarcaciones territoriales de la ciudad de México se incrementó a 2469, de los cuales 2458 contaron con servicio de la red pública (99.5%); se facturó en 1923 municipios o demarcaciones (77.88% respecto al total). En los municipios con facturación, la cuota fija se incrementó en 2020, y ésta es mayor en conexiones domésticas (INEGI, 2019; INEGI, 2021a). En relación a las coberturas de servicio de la red pública, el Relator Especial sobre los Derechos Humanos al Agua y al Saneamiento, expresó en mayo de 2017 que aunque la estadística de acceso a los servicios en México era alta, ésta es dramáticamente inferior, pues sólo refleja la existencia de infraestructura (ACNUDH, 2020). El porcentaje de población que recibió servicios de agua potable gestionados de manera segura, se estima entre el 26% y el 50% (WHO y UNICEF, 2019; UN, 2017).

## MATERIALES Y MÉTODOS

Para valorar el impacto de la medición de consumos y de los precios del agua en el cumplimiento del derecho humano al agua en México, a través de la prestación servicios gestionados de manera segura, se recabaron y analizaron datos publicados por el Instituto Nacional de Estadística y Geografía (INEGI), de los censos y encuestas que realiza periódicamente, así como datos que publica la Comisión Nacional del Agua, de la administración del recurso hídrico.

Primeramente, los datos de medición de consumo al año 2020 (INEGI, 2021a), que incluyen tomas con medidor funcionando ( $t_{cm\_tot}$ ), tomas con medidor sin funcionar ( $t_{cms\_to}$ ) y tomas sin medidor ( $t_{sm\_to}$ ), se disgregaron a nivel estatal con el fin de ubicar las coberturas y realizar análisis adicionales; al no contar con estos datos como tal para la ciudad de México, se usaron datos disponibles del número de tomas de agua sujetas a facturación bajo un esquema de servicio medido y tomas de agua sujetas a facturación o cobro bajo un esquema de cuota fija, disponibles en la misma fuente. Se presentan los 32 estados de la república con valores absolutos y relativos de medición (Figura 1, Figura 2). Las coberturas estatales varían ampliamente, del Estado de Nuevo León con prácticamente el 100% de sus tomas con medidor, hasta el Estado de Tlaxcala donde el 97.8% de sus tomas carecen de medición. Le siguen con los números más bajos Guerrero, Oaxaca y Tabasco (INEGI, 2021b).

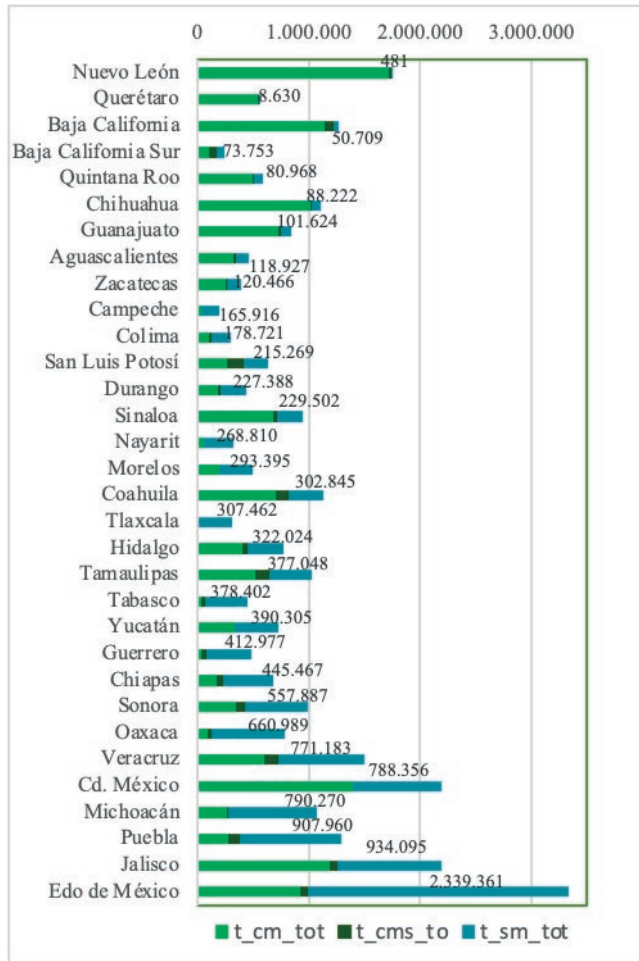

**Figura 1** | Medición a nivel estatal: Tomas con medidor funcionando ( $t_{cm\_tot}$ ), tomas con medidor sin funcionar ( $t_{cms\_to}$ ) y tomas sin medidor ( $t_{sm\_to}$ ). Orden de los estados de menor a mayor ( $t_{sm\_to}$ ). Elaboración propia a partir de (INEGI, 2021b).

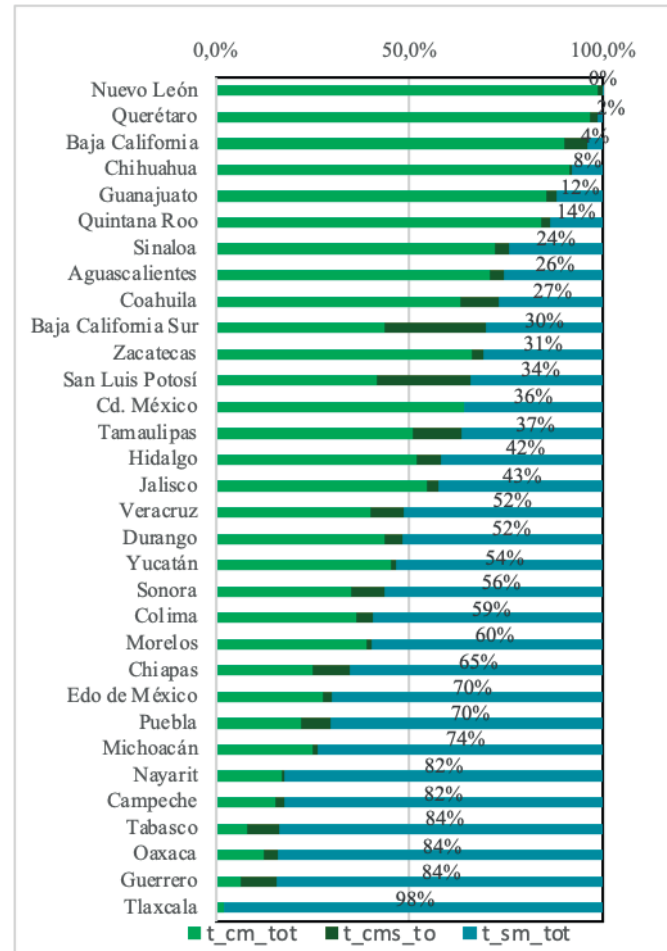

**Figura 2** | Medición a nivel estatal: Tomas con medidor funcionando ( $t_{cm\_tot}$ ), tomas con medidor sin funcionar ( $t_{cms\_to}$ ) y tomas sin medidor ( $t_{sm\_to}$ ) [%]. Elaboración propia a partir de (INEGI, 2021b).

Por otra parte, respecto al nivel del servicio gestionado de manera segura, en la Encuesta Nacional de Calidad e Impacto Gubernamental-ENCIG-2021, se determina la percepción y evaluación del público usuario sobre el servicio de agua potable recibido, a través de las respuestas a las siguientes cuestiones: a) Proviene de la red pública, b) Pureza y claridad, c) Suministro constante, d) Sin desperdicio por fugas, y e) Potabilidad (INEGI, 2022). Estos rubros cubren los criterios del derecho humano al agua y del servicio gestionado de manera segura (Tabla 1, Tabla 2). Con los datos de la encuesta, se estimó para cada estado de la república el valor del indicador 6.1.1 “Proporción de la población que utiliza servicios de agua potable gestionados de manera segura”. Se calculó el promedio de los valores obtenidos en cada entidad federativa, considerándoles igual peso a las respuestas (Tabla 3). Como se esperaba, el estado de Nuevo León, con la máxima cobertura de medición, obtuvo el mayor nivel de servicio gestionado de manera segura ( $\approx 80\%$ ). Sin embargo hay resultados que sugieren mayores análisis, entre otros de tipo social, como el de Tlaxcala que con el nivel más bajo de medición obtuvo un nivel alto en el servicio conforme a la percepción de la población ( $62\%$ ), y por el otro lado Baja California que con  $90\%$  de cobertura de medición obtuvo sólo cerca del  $47\%$  en servicio seguro.

Para medir el impacto del precio del agua en el servicio prestado, se obtuvieron datos de tarifas domésticas, disponibles públicamente en (CONAGUA, 2022) sólo para la mayoría de las capitales de los estados, o para alguna ciudad representativa. Para algunos de los estados no se contó con ninguno de estos datos, como es el caso de Nuevo León, Quintana Roo, Zacatecas, Baja

**Tabla 3** | Cobertura de medición funcionando y percepción del servicio recibido por la población.

| Entidad federativa  | Tomas con medidor funcionando (%) | Red pública (%) | Pureza y claridad (%) | Suministro constante (%) | Sin desperdicio por fugas (%) | Potabilidad (%) | Tarifa doméstica 2020 Capital (\$/m <sup>3</sup> ) | Promedio (% Manejo seguro) |
|---------------------|-----------------------------------|-----------------|-----------------------|--------------------------|-------------------------------|-----------------|----------------------------------------------------|----------------------------|
| Nuevo León          | 98.6                              | 98.3            | 85                    | 82.1                     | 58.1                          | 73.7            |                                                    | 79.44                      |
| Querétaro           | 96.5                              | 87.5            | 83                    | 74.7                     | 42.2                          | 30.5            | 30.8                                               | 63.58                      |
| Chihuahua           | 91.3                              | 94.3            | 71.4                  | 68.3                     | 47.8                          | 52.8            | 17.8                                               | 66.92                      |
| Baja California     | 90.0                              | 95.8            | 7.6                   | 73.1                     | 40.7                          | 16.4            | 26.6                                               | 46.72                      |
| Guanajuato          | 85.3                              | 94.8            | 84.9                  | 77.1                     | 59.8                          | 41.7            | 37.7                                               | 71.66                      |
| Quintana Roo        | 83.9                              | 86.5            | 60                    | 61.2                     | 29.5                          | 10.9            |                                                    | 49.62                      |
| Sinaloa             | 72.0                              | 97.8            | 60.8                  | 70                       | 44.5                          | 19.8            | 11.9                                               | 58.58                      |
| Aguascalientes      | 70.7                              | 88.7            | 74.4                  | 48                       | 28.1                          | 19.4            | 27.3                                               | 51.72                      |
| Zacatecas           | 66.2                              | 97.3            | 74.4                  | 39.8                     | 28.9                          | 25.3            |                                                    | 53.14                      |
| Cd. México          | 63.9                              | 88.8            | 51.7                  | 53.5                     | 32.3                          | 16.7            | 23                                                 | 48.6                       |
| Coahuila            | 63.0                              | 95.8            | 68.1                  | 60.6                     | 36.4                          | 32.3            | 16.9                                               | 58.64                      |
| Jalisco             | 54.4                              | 92.9            | 52.4                  | 67.6                     | 38.5                          | 9.5             | 16.8                                               | 52.18                      |
| Hidalgo             | 52.0                              | 92.9            | 62.6                  | 63.7                     | 37.5                          | 19              | 40.8                                               | 55.14                      |
| Tamaulipas          | 51.0                              | 97.2            | 42.6                  | 57.4                     | 24.2                          | 12.6            | 11.3                                               | 46.8                       |
| Yucatán             | 45.2                              | 95.2            | 80.3                  | 69.3                     | 44.1                          | 25.3            | 5                                                  | 62.84                      |
| Baja California Sur | 43.7                              | 92.8            | 79.9                  | 50.4                     | 36.3                          | 25.7            | 18.5                                               | 57.02                      |
| Durango             | 43.5                              | 98.5            | 69.0                  | 55.7                     | 42.7                          | 36.7            |                                                    | 60.52                      |
| San Luis Potosí     | 41.7                              | 92.5            | 57.8                  | 40.9                     | 24.3                          | 18              | 6                                                  | 46.7                       |
| Veracruz            | 39.9                              | 95.1            | 41                    | 49                       | 25.5                          | 8.6             |                                                    | 43.84                      |
| Morelos             | 38.9                              | 87.5            | 77.8                  | 54.7                     | 31.2                          | 35.8            | 7.9                                                | 57.4                       |
| Colima              | 36.3                              | 93              | 74.4                  | 66.9                     | 32.5                          | 19.1            | 14                                                 | 57.18                      |
| Sonora              | 35.1                              | 95.5            | 65.6                  | 54.8                     | 34.2                          | 28.5            | 17.8                                               | 55.72                      |
| Edo de México       | 27.8                              | 79.4            | 53.5                  | 46.2                     | 29.6                          | 19.6            | 17.3                                               | 45.66                      |
| Chiapas             | 25.0                              | 87.7            | 58.8                  | 51.1                     | 20.9                          | 9.5             | 19.1                                               | 45.6                       |
| Michoacán           | 24.9                              | 85.3            | 67.5                  | 54.1                     | 36.4                          | 20.3            | 27.7                                               | 52.72                      |
| Puebla              | 21.9                              | 78.8            | 58.3                  | 54.9                     | 35.8                          | 15              | 25.7                                               | 48.56                      |
| Nayarit             | 17.0                              | 92.4            | 70.2                  | 53.7                     | 33.8                          | 12.2            | 22.2                                               | 52.46                      |
| Campeche            | 15.5                              | 90              | 66.2                  | 54.1                     | 30.4                          | 10.1            |                                                    | 50.16                      |
| Oaxaca              | 12.4                              | 84.9            | 36.4                  | 28.9                     | 25                            | 9.8             | 4.1                                                | 37                         |
| Tabasco             | 8.0                               | 95.3            | 11.5                  | 29.5                     | 9.3                           | 1.9             | 1.5                                                | 29.5                       |
| Guerrero            | 6.6                               | 83.9            | 27.9                  | 14.1                     | 8.9                           | 4.7             | 20                                                 | 27.9                       |
| Tlaxcala            | 2.2                               | 92.5            | 78.1                  | 59                       | 35.9                          | 44.5            | 10.1                                               | 62                         |
| Promedio            | 47.6                              | 91.52           | 61.03                 | 55.76                    | 33.91                         | 22.68           | 18.38                                              | 52.98                      |

Elaboración propia a partir de (INEGI, 2021b; INEGI, 2022; CONAGUA, 2022).

california Sur, Veracruz, y Campeche. Asimismo, se usaron datos de Tijuana para Baja California, León para Guanajuato, Culiacán para Sinaloa, Reynosa para Tamaulipas, y Acapulco para Guerrero (Tabla 3).

Finalmente, se determinó la curva de mejor ajuste entre datos de “tomas con medidor funcionando” y de “porcentaje de manejo seguro”, del conjunto de estados de la república, con su coeficiente de correlación (Figura 3); asimismo, entre datos de “tarifa doméstica” y de “porcentaje de manejo seguro” (Figura 4),

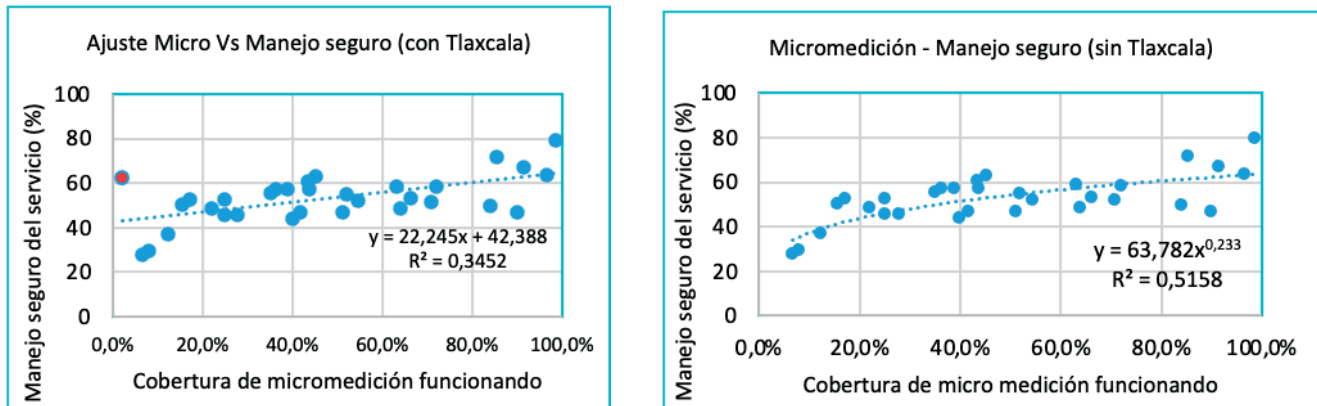

**Figura 3** | Correlación estatal entre medición de consumos 2020 y percepción de servicios de agua potable gestionados de manera segura 2021. Elaboración propia a partir de (INEGI, 2021b; INEGI, 2022).

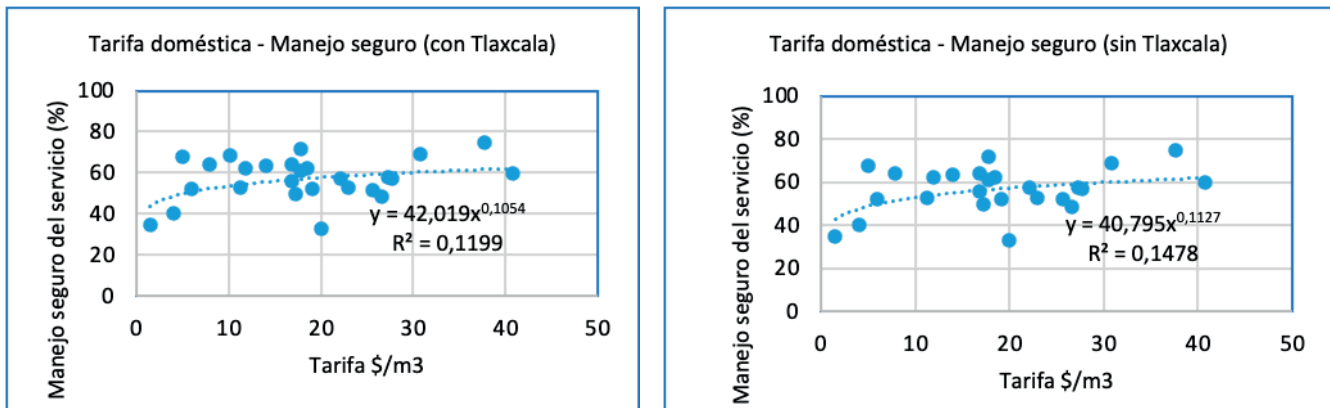

**Figura 4** | Correlación estatal entre precios del agua 2021 y percepción de servicios de agua potable gestionados de manera segura 2021. Elaboración propia a partir de (INEGI, 2021b; INEGI, 2022; CONAGUA, 2022).

## RESULTADOS

La correlación obtenida entre la medición del consumo y el servicio de agua potable gestionado de manera segura (0.5823), muestra que la medición es una acción determinante para poder incrementar la proporción de población con este tipo de servicio. Se debe tener en cuenta que la UNICEF y la OMS hacen un monitoreo de los avances a través del indicador 6.1.1 del Objetivo de Desarrollo Sostenible 6, dada la importancia del derecho humano al agua, y de éste para el cumplimiento de todos los derechos humanos (WHO-UNICEF, 2019). Por cuanto a la correlación de precios del agua con el servicio gestionado de manera segura, es menor a 0.2, lo que puede indicar el grado de aporte al servicio de agua segura, adicional al aporte de la medición, y considerando que más del 50% del servicio en el país se factura en base a cuota fija.

Por otra parte, el promedio de la percepción nacional sobre la potabilidad del agua de la red pública, del 22.68% (Tabla 3), derivado de la Encuesta Nacional de Calidad e Impacto Gubernamental-ENCIG-2021, es coincidente con los resultados del Módulo de Hogares y Medio Ambiente (MOHOMA) de la Encuesta Nacional de Hogares (ENH). Este muestra que el porcentaje de hogares mexicanos en los que se bebe agua de garrafón se incrementó del 70.8% en 2015 a 76.3% en 2017, y que sólo cerca del 20% toma agua de la red pública. Esto como consecuencia, en parte, del nivel actual del servicio gestionado de manera segura, en el cual como se ha visto, es determinante la cobertura de medición de consumos (Figura 5, Figura 6) (INEGI, 2018a; INEGI, 2018b). Se aclara

que el garrafón es un recipiente de plástico con una capacidad de 19 L o 20 L, en el cual se distribuye agua para consumo humano, procesada en plantas purificadoras. Las botellas son recipientes con capacidades generalmente de 1 L, así como menores y mayores de 1 L, generalmente con agua de purificadoras. En menor medida se encuentran en el mercado botellas con agua mineral, así como natural, de precio mucho mayor a las de purificadoras.

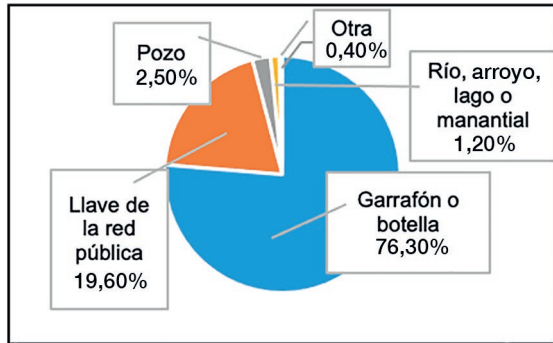

**Figura 5** | Distribución porcentual de los hogares según fuente de abastecimiento del agua para beber 2017. Elaboración propia a partir de (INEGI, 2018a).

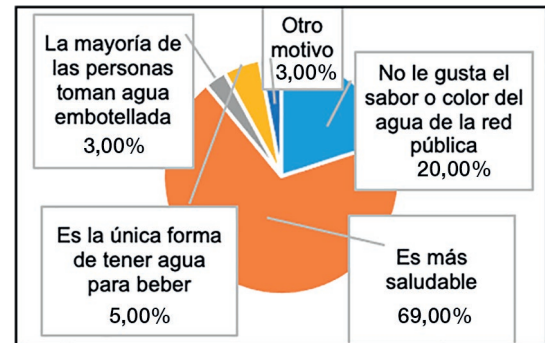

**Figura 6** | Distribución porcentual de los hogares según motivos para beber agua embotellada 2017. Elaboración propia a partir de (INEGI, 2018a).

## DISCUSIÓN

Los resultados obtenidos, confirman que la medición de consumos es determinante para poder incrementar la proporción de población con servicio de agua potable gestionado de manera segura, y con ello dar cumplimiento al derecho humano al agua. Sin embargo, es deseable contar con mayor información y realizar análisis más profundos, que permitan por ejemplo obtener resultados a nivel municipio. Estos primeros resultados proporcionan elementos para la toma de decisiones de política pública y para los programas presupuestarios, que incluyan recursos suficientes para el incremento sustantivo de las coberturas de medición, que actualmente se estima en menos del 50% a nivel nacional. Una consecuencia directa del nivel actual del servicio gestionado de manera segura, es el consumo de agua de garrafón por más del 70% de la población, lo cual es entendible por la desconfianza a beber agua del servicio público. Sin embargo, el consumo de agua de botella, que también se consume en México y globalmente, puede tener otras motivaciones, como la publicidad, la facilidad de uso en reuniones y fuera de casa, el poder adquisitivo y el lujo, y otras. Lo que sí es cierto, es que la venta de estos dos productos incrementa la sobreexplotación de las fuentes de abastecimiento y la contaminación ambiental, además no ser garantía de estar libres de contaminantes (Tabla 4) (Bohuel *et al.*, 2023).

**Tabla 4** | Algunos reportes de agua embotellada contaminada, en México y otros países.

| Año  | Tipo o marca                     | Contaminantes                                                                                                                                                                   |
|------|----------------------------------|---------------------------------------------------------------------------------------------------------------------------------------------------------------------------------|
| 2004 | En marcas de agua mineral        | Detección de parásitos humanos <i>Giardia</i> y <i>Cryptosporidium</i> (protozoario).                                                                                           |
| 2006 | 68 marcas de agua mineral        | 12% de las marcas con contaminación bacteriana confirmada por <i>Legionella pneumophila</i> .                                                                                   |
| 2009 | Agua mineral                     | Pesticidas (por ejemplo, DDT, endosulfán) hasta 0.15 µg L <sup>-1</sup>                                                                                                         |
| 2010 | 6 marcas                         | Niveles de bifenilos policlorados (PCB) entre 0.035 a 0.067 µg L <sup>-1</sup>                                                                                                  |
| 2013 | 5 a 17 marcas de agua purificada | Alquilfenoles y ftalatos entre no detectables hasta 9.9 µg L <sup>-1</sup> (p. ej., bisfenol A, triclosán).                                                                     |
| 2018 | No especificado                  | El 93% de las muestras contenía microplásticos y partículas de polímeros sintéticos, 10.4 partículas L <sup>-1</sup> (> 100µm) y 325 partículas L <sup>-1</sup> (6.5 a 325 µm). |

Fuente: Elaboración propia a partir de (Bohuel *et al.*, 2023).

Se ha encontrado que al beber agua de botella de plástico se ingieren cerca de  $1.3 \times 10^5$  partículas micro plásticas anualmente, mientras que del servicio público sólo 4000 (Furh y Franklin, 2020). El volumen de demanda de agua embotellada de Estados Unidos, China e Indonesia comprende la mitad del mercado mundial; Alemania es el mercado más grande de Europa, México en

América Latina y el Caribe (ALC), y Sudáfrica en África. Sin embargo, en valores per cápita Singapur y Australia registran los mayores consumos; en ALC Chile tiene el mayor valor, seguido de lejos por México, y luego muy cercanos Ecuador, Guatemala, Costa Rica y Bolivia. Las ventas per cápita las siguen encabezando Singapur y Australia; en ALC Chile está nuevamente a la cabeza, y Costa Rica y los demás países de la región están por arriba de México; sólo Argentina registra la menor venta per cápita de ALC y de los demás países reportados (Figura 8) (Bohuel *et al.*, 2023).

Una de las consecuencias de la demanda de agua embotellada, es que puede promover la extracción incontrolada de agua subterránea, sin contribuir a un suministro sostenible a largo plazo, dadas también las cantidades adicionales requeridas de agua por cada litro producido; otra es la contaminación por los plásticos que se desechan al consumir el producto, de la cual aún no se ha encontrado una solución innovadora que pueda reducir radicalmente los impactos ambientales (Bohuel *et al.*, 2023). Anualmente, se producen más de 460 millones de toneladas de plástico en todo el mundo, de las cuales se reciclan sólo  $\approx 9\%$ , y la mayor parte pasa por los ríos y los suelos para terminar en los océanos, donde pueden descomponerse en micro plásticos e incluso en nano plásticos, y transportarse a grandes distancias, en el océano y la atmósfera, con una permanencia de cientos de años (Editorial, 2023). México es el 11° productor de plásticos a nivel mundial (Furh y Franklin, 2020). No es difícil ver que gran parte de esos plásticos que dañan el ambiente y la vida corresponden a envases de refrescos y agua embotellada, de los que México, al ser el mayor mercado ALC, tiene un aporte sustantivo.

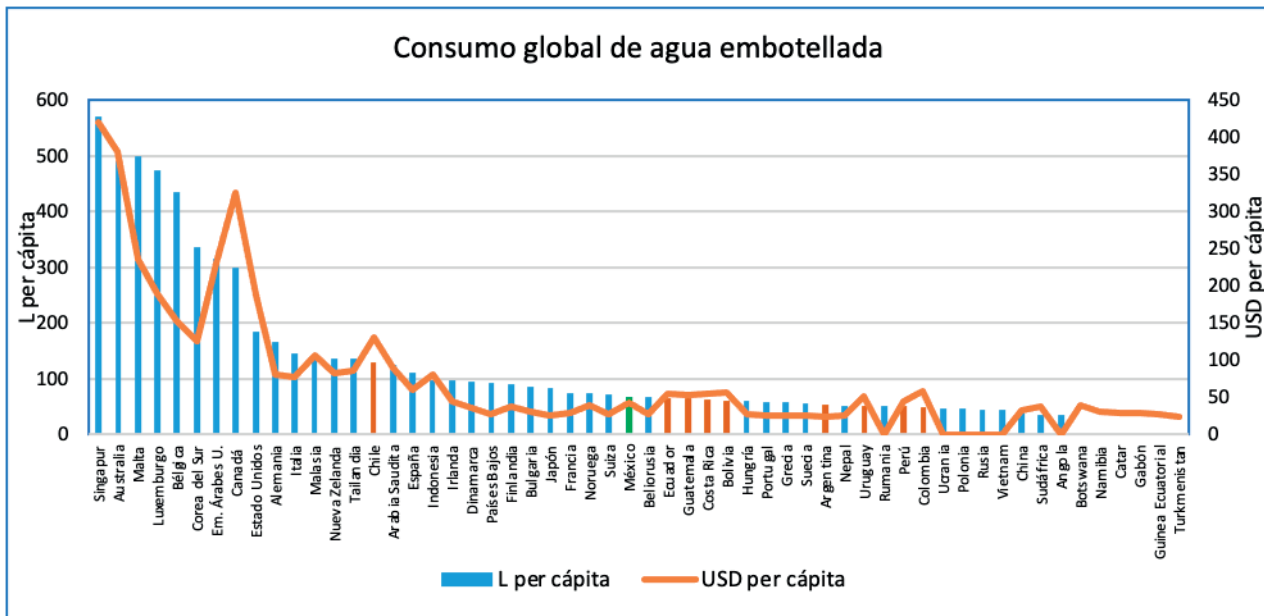

**Figura 8** | Top 50 de países en 2021 por consumo y por mayor venta per cápita de agua embotellada (Purificada + Natural + Natural Mineral). Elaboración propia aproximada a partir de (Bohuel *et al.*, 2023).

Los resultados de la correlación precios del agua con el servicio gestionado de manera segura, sugieren revisar las tarifas y buscar la socialmente óptima, así como analizar la viabilidad de la medición universal o bien la medición socialmente óptima.

Por otra parte, la medición de consumos afronta diversos retos, donde el de financiamiento puede no ser el de mayor peso. El incremento de la cobertura de medidores funcionando, no necesariamente conduce a obtener los beneficios esperados que coadyuven a incrementar los servicios manejados de manera segura, y hasta pueden generar efectos negativos. Algunos de estos efectos son: el rechazo, el incremento del clandestinaje, robos, manipulación fraudulenta de los aparatos de medición (Ziemendorff, 2020), entre otros. Asimismo, efectos no esperados, como los reportados en un sector de la ciudad de México, donde la disminución de consumos del orden de 15% por la instalación generalizada de medidores, no coincidía con los volúmenes suministrados, debido a que probablemente se provocó aumento de presión en las tuberías y por tanto aumento de las fugas (Jiménez-Magaña *et al.*, 2008). Otras variables, como el servicio intermitente, el clima, la disponibilidad del recurso hídrico y su gobernanza, las sociedades



humanas y otras, son sólo parte de la complejidad de los servicios públicos de agua y saneamiento, y por tanto de la medición de consumos. Como se ve, existen problemas diversos para la implementación y operación eficientes de los sistemas de medición, entre ellos los de tipo técnico-organizacional, social, económico y ambiental.

A partir de experiencias en programas federales de eficiencia física y comercial, de la Comisión Nacional del Agua (CONAGUA) y principalmente del Banco Nacional de Obras y Servicios Públicos, S. N. C., (BANOBRAS), así como de diferentes fuentes de información, se identificaron 39 problemas principales que podrían obstaculizar la implementación, ampliación, operación y renovación de los sistemas de medición de consumos, e impedir alcanzar todos los objetivos que de éstos se esperan. Se presenta una carta general cualitativa de ocho casos de conexiones domiciliarias y cuatro tipos de problemas que las afectan (Figura 9), a los que se pueden agregar casos y problemas particulares. Por ejemplo, la distribución intermitente, permite a los usuarios que no están conformes con la medición de sus consumos, aducir que los aparatos miden flujo de aire y que la calidad del

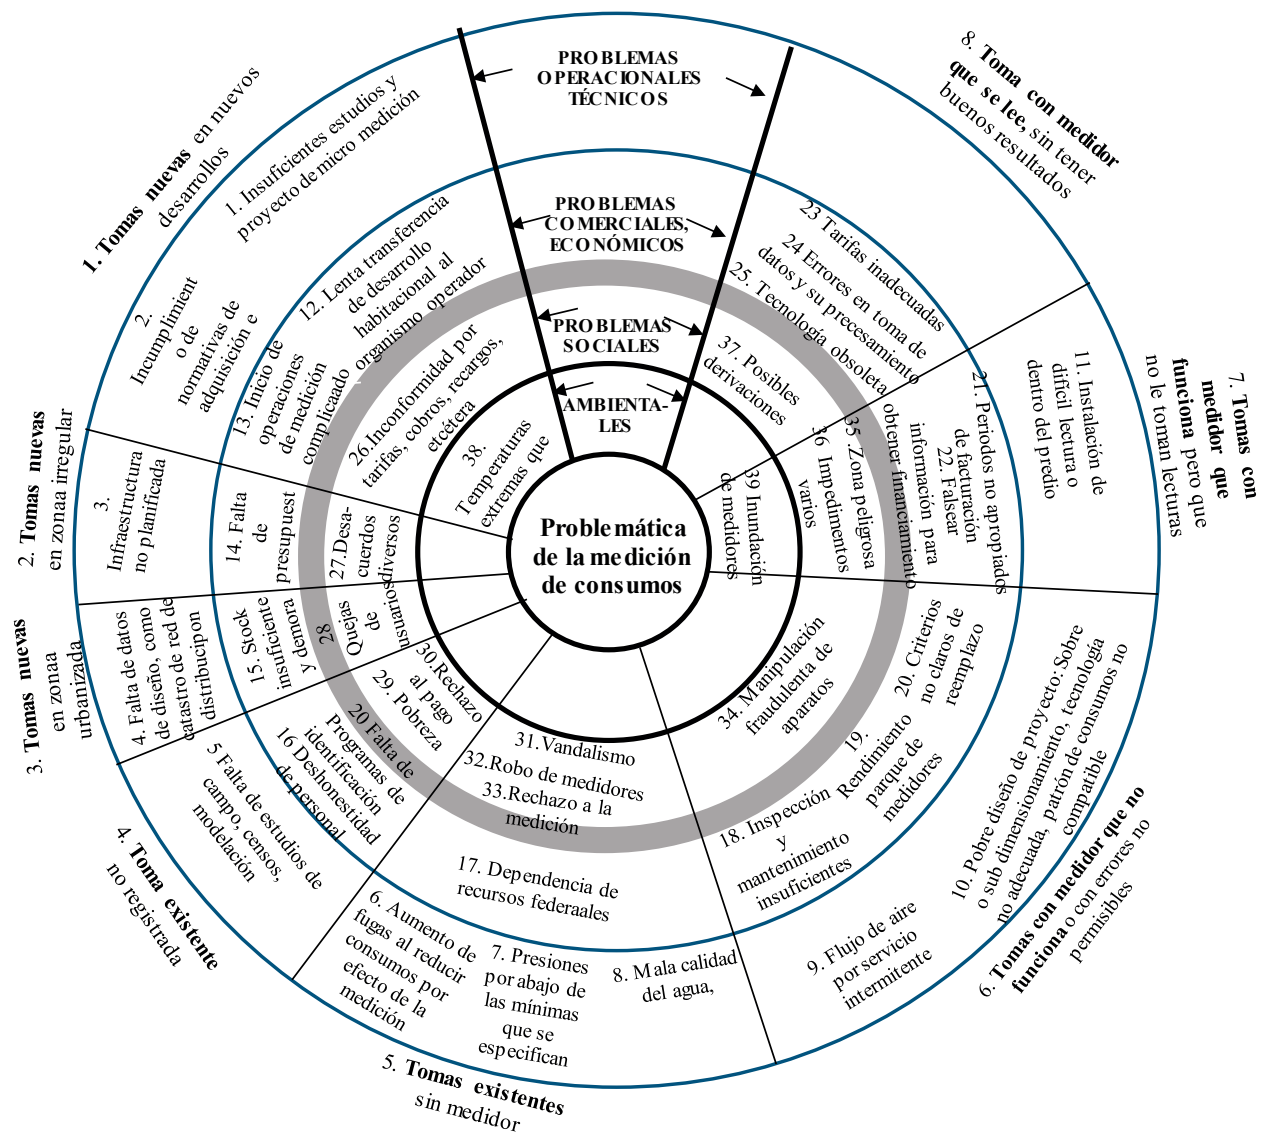

Figura 9 | Problemática de la medición de consumos y del cobro medido en diferentes condiciones de tomas domiciliarias (ocho casos). Elaboración propia a partir de Fuentes como (BANOBRAS et al., 2015; Liemberger, 2006; Jiménez-Magaña et al., 2008) y otros.

servicio no es aceptable, ya que se generan varios efectos indeseados, como la mayor incidencia de fugas de agua, incremento de costos de operación y mantenimiento (Yepes *et al.*, 2001), y vulnerabilidad a la contaminación microbiológica (UNICEF, 2017).

El problema 1 que se muestra en la Figura 9, sugiere realizar la planificación de la medición de consumos de manera sistematizada, incluyendo la etapa de estudios y proyectos, implementación, evaluación del rendimiento del parque de medidores, y desempeño del sistema; asimismo la etapa de renovación, considerando los demás problemas generales y problemas específicos. Dada la importancia de la componente social, es conveniente realizar una planeación participativa, con ayuda de herramientas como la Metodología de Marco Lógico (MML). Asimismo, con resultados de los censos y encuestas del Instituto Nacional de Estadística y Geografía (INEGI), información de la Comisión Nacional del Agua (CONAGUA), el Consejo Nacional de Evaluación de la Política de Desarrollo Social (CONEVAL) y de otras fuentes (SHCP, 2019; SED-SHCP, 2021; INEGI, 2023; CONAGUA, 2023; CONEVAL, 2023). Considerar también, que se trata de un sistema complejo, sujeto a la dependencia crítica de las condiciones iniciales o “efecto mariposa” (Sánchez-Santillán y Garduño-López, 2007), donde el enfoque de sistemas permite el análisis organizado y creativo de problemas para generar soluciones factibles (Gonima, 1980). Se recomienda desarrollar un sistema informático para apoyar a los municipios del país en la planificación y diseño estandarizados de los sistemas de medición de consumos. Que este sistema les facilite la gestión de inversiones en base a la determinación de un Presupuesto basado en Resultados, la aplicación de la MML y dentro de ésta el análisis del Árbol de Problemas, y la matriz de indicadores para resultados para establecer la línea base y la evaluación periódica de avances. Entre otros requerimientos, el sistema informático debe analizar la viabilidad técnica, económica, social y ambiental de diferentes alternativas, para la selección de aquella que aporte mayores beneficios. Asimismo, que pueda generar memorias descriptivas y de cálculo, especificaciones, presupuestos y planos.

## CONCLUSIONES

El desarrollo de este trabajo permite confirmar la correlación entre la cobertura de servicios de agua potable gestionados de manera y la cobertura de medición de consumos. Asimismo, clarificar la complejidad de los servicios de agua y saneamiento, sujetos a problemas del ambiente externo, así como los problemas a resolver internamente por los organismos operadores de agua potable y saneamiento. El coeficiente de correlación entre la cobertura de medición funcionando y la de servicio gestionado de manera segura, a nivel estatal, es 0.58, excluyendo el caso de Tlaxcala, que con sólo 2.2% de medición funcionando, la población percibe una gestión segura del 62%.

La cobertura actual de los servicios de agua potable gestionados de manera segura, no mayores al 50%, propicia el consumo de agua de garrafón para beber, que en México llega a ser hasta del 76% la población consumidora. Esto impacta en la asequibilidad de la población al agua potable, si se suman las tarifas del servicio público y el precio del agua de garrafón. La población que bebe agua embotellada, ingieren cerca de  $1.3 \times 10^5$  partículas micro plásticas anualmente, mientras que del servicio público sólo 4000, desconociéndose los posibles efectos en la salud. Además, el consumo de agua embotellada, garrafón y botella, no garantiza el que el producto sea salubre y apto para consumo humano, ya que se han identificado diversas marcas y tipos de producto con diferentes tipos de contaminantes. La publicidad de estos productos influye mucho en su consumo, el cual les genera ganancias multimillonarias a las grandes transnacionales, a las que les viene muy bien que la gente muestre desconfianza al agua de la red pública.

Los municipios de México tienen amplias atribuciones y responsabilidades en los servicios de agua y saneamiento, pero carecen de suficiente respaldo presupuestal y capacidades de gestión, por lo que se pueden desarrollar herramientas diversas para coadyuvar en su fortalecimiento institucional y técnico. Entre éstas, un sistema informático para la planificación de la medición de consumos, de manera estandarizada. El incremento de la cobertura de medidores instalados, e incluso de medidores funcionando, no necesariamente conduce a obtener los beneficios esperados que coadyuven a incrementar los servicios de agua y saneamiento manejados de manera segura, ya que pueden generar efectos negativos como el rechazo y el claudestinidad. En servicios como el de distribución de energía eléctrica no existe el rechazo a la medición del consumo, pero sí existen pérdidas en conexiones ilegales, manipulación fraudulenta de medidores, e incorrecta gestión comercial. Al año 2014 se registraron pérdidas totales del 14% en promedio: técnicas 6% y no técnicas del 8%.

## AGRADECIMIENTOS

Se agradece al Instituto Mexicano de Tecnología del Agua por el apoyo proporcionado para realizar este trabajo, a partir de los resultados de diferentes proyectos, internos y contratados, entre otros los del Programa de Modernización de Áreas Comerciales de Organismos Operadores de Agua, como los realizados en el Estado de Querétaro y en el Estado de Zacatecas (BANOBRAS-CEA-IMTA, 2018, BANOBRAS-JIAPAZ-IMTA, 2018).

## REFERENCIAS

- ACNUDH. 10 de junio de 2020. Naciones Unidas, Derechos Humanos, Oficina del Alto Comisionado. Obtenido de Declaración de final de misión del Relator Especial sobre los derechos humanos al agua y al saneamiento, Sr. Léo Heller: <https://www.ohchr.org/SP/NewsEvents/Pages/DisplayNews.aspx?NewsID=21608&LangID=S>
- BANOBRAS-CEA-IMTA. 2018. HC1633.3 Supervisión de acciones del proyecto ejecutivo de la Comisión Estatal de aguas de Querétaro. Jiutepec, Morelos: IMTA.
- BANOBRAS-CESPM-IMTA. 2015. Diagnóstico y proyecto ejecutivo de modernización del área comercial de la Comisión Estatal de servicios públicos de Mexicali, Baja California. Mexicali, Baja California: Programa de Modernización de áreas comerciales de los organismos operadores de agua potable (PMACOA).
- BANOBRAS-JIAPAZ-IMTA. 2018. Diagnóstico y plan de acción de modernización del área comercial de la Junta Intermunicipal de agua Potable y Alcantarillado de Zacatecas. Jiutepec, Morelos: IMTA.
- Bartone, C. R. 2003. *Optimización de políticas de medición en sistemas de distribución de agua potable*. Lima: CEPIS.
- Bohuel, Z., Köpke, J., Mina, M., Smakhtin, V. 2023. *Global Bottled Water Industry: A Review of Impacts and Trend*. Hamilton, Canada: United Nations University-Institute for Water, Environment and Health. <https://doi.org/10.53328/AGYM7357>
- Cavalcanti-Coelho, A. 1996. *Medición de agua: Política y práctica*. Recife: CEPIS.
- Chambouleyron, A. 2004. Optimal Water Metering and Pricing. *Water Resources Management*, 305–319. <https://doi.org/10.1023/B:WARM.0000048470.25647.16>
- CONAGUA. 2022. Estadísticas del Agua en México 2021. México.
- CONAGUA. 20 de junio de 2023. Gobierno de México-Secretaría de Medio Ambiente-Comisión Nacional del Agua. Obtenido de <https://www.gob.mx/conagua>
- CONEVAL. 20 de junio de 2023. Consejo Nacional de Evaluación de la Política de Desarrollo Social. Obtenido de <https://www.coneval.org.mx/Paginas/principal.aspx>
- Domínguez-Mares, M., Arriaga-Medina, J. A. 2015. Derecho Humano al agua. *Impluvium-Publicación digital de la Red del Agua UNAM*, número 4, enero-junio 2015, 2-3.
- Editorial. 2023. Solutions for plastic pollution. *Nature geoscience*, 16, 655. <https://www.nature.com/articles/s41561-023-01255-7>
- Euromet. 2008. *Metrología abreviada*. Lyngby, Denmark: EUROMET.
- Furh, L., Franklin, M. 2020. *Atlas del Plástico-Datos y cifras sobre el mundo de los polímeros sintéticos*. México: Fundación Heirich Böll Ciudad de México, México y el Caribe- Movimiento Break Free From Plastic.
- Gonima, A. 1980. Concepción sistémica. Taller sobre el desarrollo del sistema comercial de las empresas de agua potable y alcantarillado (pág. 14). Lima, Perú: CEPIS.
- INEGI. 2018a. Instituto Nacional de Estadística y Geografía. Comunicado de prensa Núm. 262/18, 5 de junio de 2018, Resultados del Módulo de Hogares y Medio ambiente (MOHOMA). INEGI.

- INEGI. 2018b. Instituto Nacional de Estadística y Geografía. Módulo de Hogares y Medio Ambiente (MOHOMA) 2017. Precisiones estadísticas. 2018. Aguascalientes: INEGI.
- INEGI. 2019. Instituto Nacional de Estadística y Geografía. (M. d. Saneamiento, Editor) Obtenido de Censo Nacional de Gobiernos Municipales y Demarcaciones Territoriales de la Ciudad de México 2019. Tabulados básicos: <https://inegi.org.mx/app/descarga/>
- INEGI. 2021a. Instituto Nacional de Estadística y Geografía. 2021. Censo nacional de gobiernos municipales y demarcaciones territoriales de la Ciudad de México 2021. Tabulados básicos. Obtenido de <https://www.inegi.org.mx/programas/cngmd/2021/#Tabulados>
- INEGI. 2021b. Instituto Nacional de Estadística y Geografía. 2021. Censo nacional de gobiernos municipales y demarcaciones territoriales de la Ciudad de México 2021. Datos abiertos. Obtenido de [https://www.inegi.org.mx/programas/cngmd/2021/#Datos\\_abiertos](https://www.inegi.org.mx/programas/cngmd/2021/#Datos_abiertos)
- INEGI. 2022. Instituto Nacional de Estadística y Geografía. 2022. Encuesta Nacional de Calidad e Impacto Gubernamental-ENCIG-2021. Aguascalientes: [https://www.inegi.org.mx/contenidos/programas/encig/2021/doc/encig2021\\_principales\\_resultados.pdf](https://www.inegi.org.mx/contenidos/programas/encig/2021/doc/encig2021_principales_resultados.pdf). Obtenido de ENCIG-2021.
- INEGI. 2023. Instituto Nacional de Estadística y Geografía. 20 de junio de 2023. INEGI-40 años de conocer México. Obtenido de <https://www.inegi.org.mx/>
- Jiménez-Magaña, M. R., Fuentes-Mariles, O., Rodríguez-Vázquez, K., De Luna-Cruz, F., Carrillo-Sosa, J. J. 2008. Importancia del control de presiones en la reducción de fugas, y su aplicación al sector Reynaco, ciudad de México. *SEREA 2008, VIII Seminario Iberoamericano sobre sistemas de abastecimiento y drenaje*. Instituto de Ingeniería e Instituto de Investigaciones en Matemáticas Aplicadas y en Sistemas de la Universidad Nacional Autónoma de México. Lisboa, Portugal: SEREA.
- Liemberger, R. 2006. *Introduction to Water Loss Analysis and Reduction*. International Water Association, World Bank Institute.
- Linaweaver, F. P., Geyer, J. C., Wolff, J. B. 1965. *A Study of Residential Water Use*. Baltimore, Maryland: Department of Environmental Engineering Science, The Johns Hopkins University.
- López-Hernández, R. I., García-Rojas, J., Cortez-Mejía, P. E. 2014. La micro medición del agua como instrumento de gobernabilidad a largo plazo para grandes núcleos urbanos. *Asociación Mexicana de Hidráulica-XXII Congreso Nacional de Hidráulica*, Puerto Vallarta, Jalisco, 8.
- Martínez-Austria, P. F. 2013. Los retos de la seguridad hídrica. *Tecnología y Ciencias del Agua*, 4(5), 165-180.
- Monks, I., Stewart, R. A., Sahin, O., Keller, R. J. 2021. Taxonomy and model for valuing the contribution of digital water meters to sustainability objectives. *Journal of Environmental Management*, 14. <https://doi.org/10.1016/j.jenvman.2021.112846>
- OCDE. 2013. *Making Water Reform Happen in Mexico*. México: OECD Secretary-General, Angel Gurría.
- ONU. 2018a. 07 de febrero de 2018. *Agua*. Obtenido de Los desafíos del agua: <http://www.un.org/es/sections/issues-depth/water/index.html>.
- ONU. 2018b. *Sustainable Development Goal 6-Synthesis Report 2018 on Water and Sanitation*. New York, New York 10017, United States of America: United Nations Publications.
- ONU. 2023. 09 de octubre de 2023. *Objetivos del Desarrollo Sostenible*. Obtenido de <http://www.un.org/sustainabledevelopment/es/water-and-sanitation/>
- Sánchez-Santillán, N., Garduño-López, R. 2007. El clima, la ecología y el caos desde la perspectiva de la teoría general de sistemas. *Ingeniería Investigación y Tecnología*, 8(3), 183-195. <https://doi.org/10.22201/ii.25940732e.2007.08n3.015>
- SED-SHCP. 2021. 11 de Julio de 2021. *Guía para el Diseño de la Matriz de Indicadores para Resultados*. Obtenido de <https://www.gob.mx/shcp/documentos/guia-para-el-diseno-de-la-matriz-de-indicadores-para-resultados>
- SHCP. 2019. Diplomado Presupuesto basado en resultados 2019. México: SHCP.

UNICEF, W. A. 2017. *Safely managed drinking water-thematic report on drinking water 2017*, Geneva, Switzerland: WHO and UNICEF.

UN-Water. 2017. *Guía para el monitoreo integrado del Objetivo de Desarrollo Sostenible 6 sobre agua y saneamiento*. Metas e indicadores mundiales. ONU.

WHO-UNICEF. 2019. 10 de julio de 2019. *Joint Monitoring Programme (JMP)*. Obtenido de Drinking water: <https://washdata.org/monitoring/drinking-water>

Yepes, G., Ringskog, K., Sarkar, S. 2001. The High Costs of Intermittent Water Supplies. *Journal of Indian Water Works Association*, 33(2) 167–70.

Ziemendorff, S. 2020. Medidas indicativas y preventivas contra la manipulación fraudulenta de medidores de agua. *Tecnología y Ciencias del agua*, 11(4), 244-278. <https://doi.org/10.24850/j-tyca-2020-04-08>
